# Supplementary material
Source: Springer Nature journal article supplement (https://www.springermedizin.de/resource/supplementary/12936_2012_2197_MOESM4_ESM.pdf/9542640)

A.

MSP-1<sub>19</sub>

EBA-175

AMA-1

DBL $\alpha$ 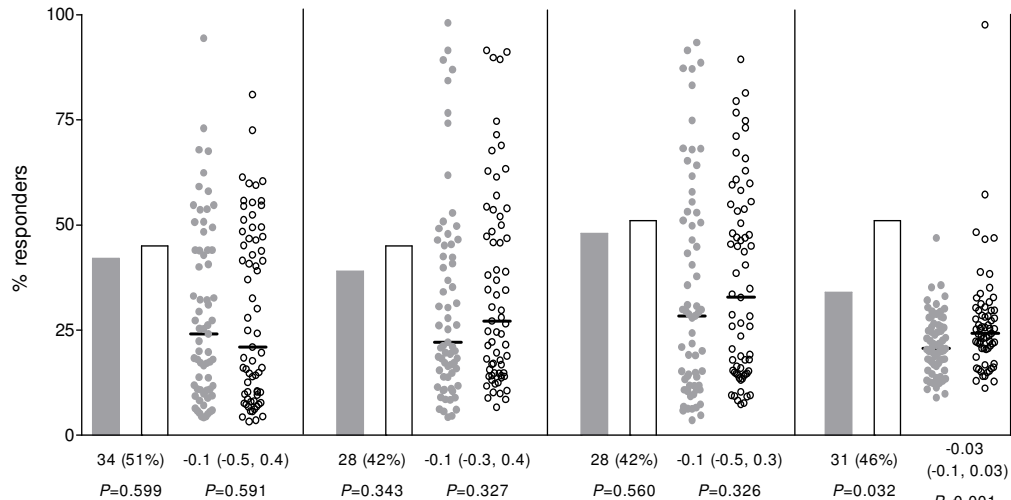

B.

*Pf* lysate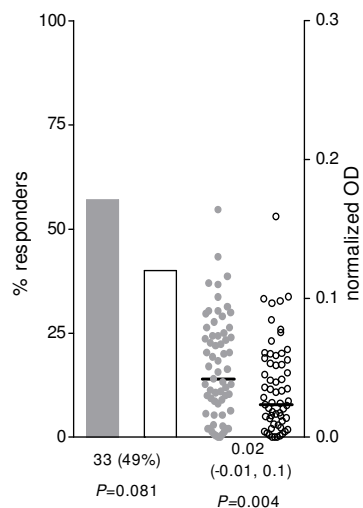

Supplement: MOESM4 [file 9542640]
